# Supplementary figures and images for: A Short–Time Scale Colloidal System Reveals Early Bacterial Adhesion Dynamics
Source: PLOS journal article supplement (doi:10.1371/journal.pbio.0060167), 2008-07-02

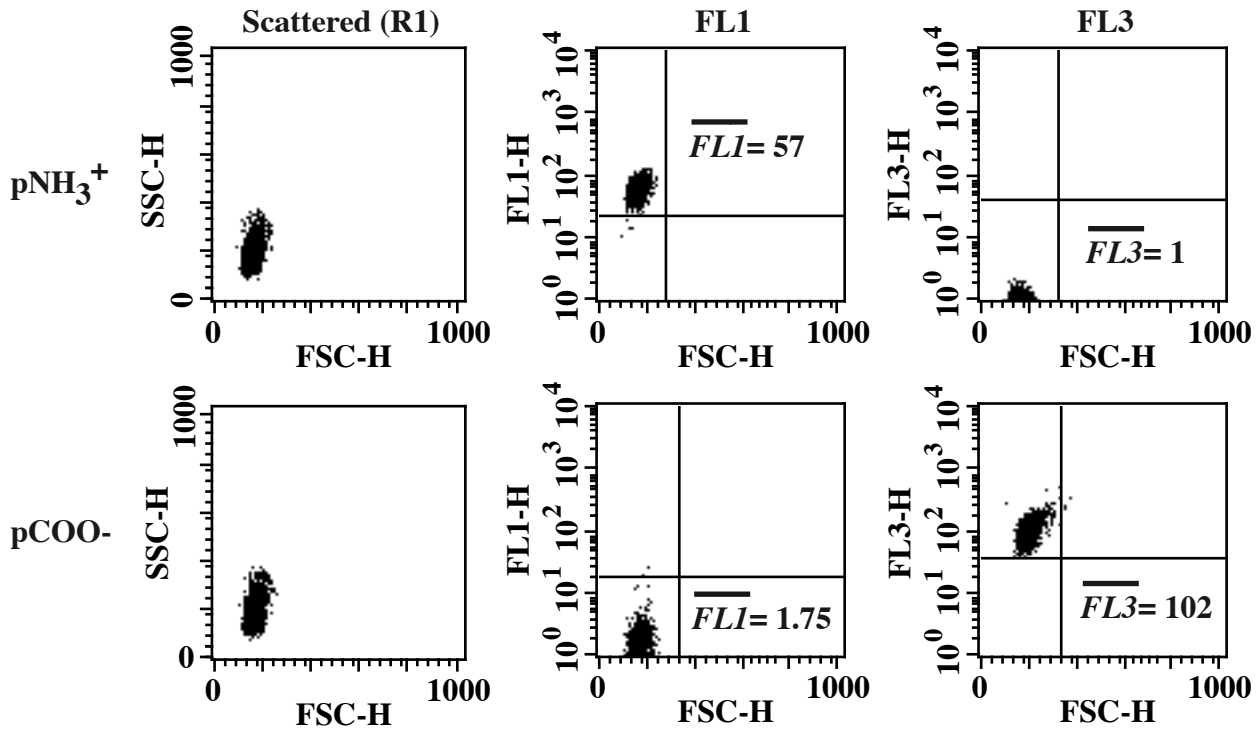

Supplement: S1 (10.1371/journal.pbio.0060167.s001) [file journal.pbio.0060167.s001]

Mixtures

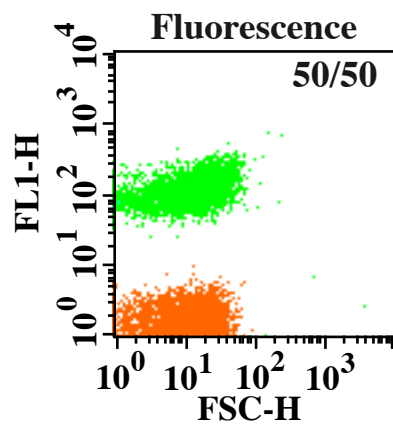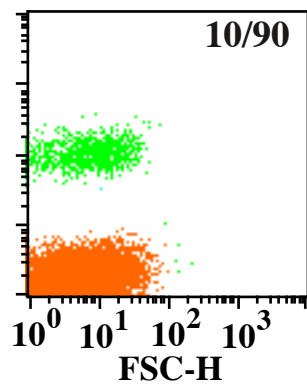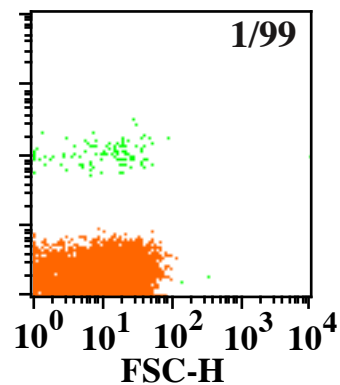

Supplement: S2 (10.1371/journal.pbio.0060167.s002) [file journal.pbio.0060167.s002]
